# Supplementary material for: Reproductive behavior drives female space use in a sedentary Neotropical frog
Source: PeerJ. 2020 Apr 17;8:e8920. doi: 10.7717/peerj.8920 (PMC7169969; doi:10.7717/peerj.8920)
Supplement: Data S1 — Spatial coordinates of tracked females [file peerj-08-8920-s024.xlsx]

## Sheet: Recco16_females_v2_mf_UTM22N
CARRIER_ID	DATE	TIME	X_COORDINATES	Y_COORDINATES
f10	2016-02-12	11:45	314188	446484
f10	2016-02-12	12:45	314187	446484
f10	2016-02-12	13:45	314187	446484
f10	2016-02-12	14:45	314187	446484
f10	2016-02-12	15:45	314187	446484
f10	2016-02-12	16:45	314187	446483
f10	2016-02-12	17:15	314186	446483
f10	2016-02-12	17:45	314186	446483
f10	2016-02-12	18:15	314186	446483
f10	2016-02-13	08:45	314186	446483
f10	2016-02-13	09:45	314185	446480
f10	2016-02-13	10:45	314185	446480
f10	2016-02-13	11:45	314185	446480
f10	2016-02-13	12:45	314190	446475
f10	2016-02-13	13:45	314191	446473
f10	2016-02-13	14:45	314191	446472
f10	2016-02-13	15:45	314192	446471
f10	2016-02-13	16:45	314205	446466
f10	2016-02-13	17:45	314205	446466
f10	2016-02-14	08:45	314205	446466
f10	2016-02-14	09:45	314205	446466
f10	2016-02-14	10:45	314205	446466
f10	2016-02-14	11:45	314205	446466
f10	2016-02-14	12:45	314205	446466
f10	2016-02-14	13:45	314205	446466
f10	2016-02-14	14:45	314205	446466
f10	2016-02-14	15:45	314205	446466
f10	2016-02-14	16:45	314205	446466
f10	2016-02-14	17:45	314205	446466
f10	2016-02-14	18:15	314205	446466
f10	2016-02-15	08:45	314205	446466
f10	2016-02-15	09:45	314204	446466
f10	2016-02-15	10:45	314205	446466
f10	2016-02-15	11:45	314205	446466
f10	2016-02-15	12:45	314205	446466
f10	2016-02-15	13:45	314205	446466
f10	2016-02-15	14:45	314205	446466
f10	2016-02-15	15:45	314205	446466
f10	2016-02-15	16:45	314205	446466
f10	2016-02-15	17:45	314206	446466
f10	2016-02-15	18:15	314205	446466
f10	2016-02-16	08:45	314205	446466
f10	2016-02-16	09:45	314205	446466
f10	2016-02-16	10:45	314205	446466
f10	2016-02-16	11:45	314205	446466
f10	2016-02-16	12:45	314205	446466
f10	2016-02-16	13:45	314205	446466
f10	2016-02-16	14:45	314206	446466
f10	2016-02-16	15:45	314205	446466
f10	2016-02-16	16:45	314205	446466
f10	2016-02-16	17:45	314206	446466
f10	2016-02-17	08:45	314205	446466
f10	2016-02-17	09:45	314205	446466
f10	2016-02-17	10:45	314205	446466
f10	2016-02-17	11:45	314207	446467
f10	2016-02-17	12:45	314207	446467
f10	2016-02-17	13:45	314207	446467
f10	2016-02-17	14:45	314207	446467
f10	2016-02-17	15:45	314207	446467
f10	2016-02-17	16:45	314207	446467
f10	2016-02-17	17:45	314207	446467
f10	2016-02-17	18:15	314207	446467
f10	2016-02-18	08:45	314205	446466
f10	2016-02-18	09:45	314205	446466
f10	2016-02-18	10:45	314205	446466
f10	2016-02-18	11:45	314201	446464
f10	2016-02-18	12:45	314204	446466
f10	2016-02-18	13:45	314205	446466
f10	2016-02-18	14:45	314205	446466
f10	2016-02-18	15:45	314205	446466
f10	2016-02-18	16:45	314205	446466
f10	2016-02-18	17:45	314205	446466
f10	2016-02-18	18:15	314205	446466
f10	2016-02-19	08:45	314205	446466
f10	2016-02-19	09:45	314205	446466
f10	2016-02-19	10:45	314205	446466
f10	2016-02-19	11:45	314205	446466
f10	2016-02-19	12:45	314205	446466
f10	2016-02-19	13:45	314205	446466
f10	2016-02-19	14:45	314205	446466
f10	2016-02-19	15:45	314205	446466
f10	2016-02-19	16:45	314205	446466
f10	2016-02-19	17:45	314205	446466
f10	2016-02-20	08:45	314209	446468
f10	2016-02-20	09:45	314207	446467
f10	2016-02-20	10:45	314207	446467
f10	2016-02-20	11:45	314207	446468
f10	2016-02-20	12:45	314209	446467
f10	2016-02-20	13:45	314208	446463
f10	2016-02-20	14:45	314208	446463
f10	2016-02-20	15:45	314208	446463
f10	2016-02-20	16:45	314208	446463
f10	2016-02-20	17:45	314208	446463
f10	2016-02-20	18:15	314208	446463
f10	2016-02-21	08:45	314208	446463
f10	2016-02-21	09:45	314206	446465
f10	2016-02-21	10:45	314205	446466
f10	2016-02-21	11:45	314205	446466
f10	2016-02-21	12:45	314204	446466
f10	2016-02-21	13:45	314204	446466
f10	2016-02-21	14:45	314205	446466
f10	2016-02-21	15:45	314204	446466
f10	2016-02-21	16:45	314205	446466
f10	2016-02-21	17:45	314205	446465
f10	2016-02-22	08:45	314205	446466
f10	2016-02-22	09:45	314205	446466
f10	2016-02-22	10:45	314204	446466
f10	2016-02-22	11:45	314207	446467
f10	2016-02-22	12:45	314208	446467
f10	2016-02-22	13:45	314204	446467
f10	2016-02-22	14:45	314204	446466
f10	2016-02-22	15:45	314204	446466
f10	2016-02-22	16:45	314204	446466
f10	2016-02-22	17:45	314205	446466
f10	2016-02-22	18:15	314205	446466
f10	2016-02-23	09:45	314204	446467
f10	2016-02-23	10:45	314204	446467
f10	2016-02-23	11:45	314204	446466
f10	2016-02-23	12:45	314205	446466
f10	2016-02-23	13:45	314204	446466
f10	2016-02-23	14:45	314205	446466
f10	2016-02-23	15:45	314205	446467
f10	2016-02-23	16:45	314205	446466
f10	2016-02-23	17:45	314205	446466
f10	2016-02-23	18:15	314205	446466
f10	2016-02-24	08:40	314204	446467
f10	2016-02-24	09:40	314204	446467
f10	2016-02-24	10:40	314204	446466
f10	2016-02-24	11:40	314205	446466
f10	2016-02-24	12:40	314205	446466
f10	2016-02-24	13:40	314205	446466
f10	2016-02-24	14:40	314205	446466
f10	2016-02-24	15:40	314205	446466
f10	2016-02-24	16:40	314207	446464
f10	2016-02-24	17:40	314207	446465
f10	2016-02-24	18:10	314207	446464
f12	2016-02-17	14:15	314189	446373
f12	2016-02-17	15:15	314189	446373
f12	2016-02-17	16:15	314189	446373
f12	2016-02-17	17:15	314189	446373
f12	2016-02-18	08:25	314189	446373
f12	2016-02-18	09:25	314189	446373
f12	2016-02-18	10:25	314189	446373
f12	2016-02-18	11:25	314187	446372
f12	2016-02-18	12:25	314188	446369
f12	2016-02-18	13:25	314191	446366
f12	2016-02-18	14:25	314189	446373
f12	2016-02-18	15:25	314189	446373
f12	2016-02-18	16:25	314184	446380
f12	2016-02-18	17:25	314184	446380
f12	2016-02-19	08:25	314184	446380
f12	2016-02-19	09:25	314184	446380
f12	2016-02-19	10:25	314184	446380
f12	2016-02-19	11:25	314184	446380
f12	2016-02-19	12:25	314184	446380
f12	2016-02-19	13:25	314184	446380
f12	2016-02-19	14:25	314184	446380
f12	2016-02-19	15:25	314184	446380
f12	2016-02-19	16:25	314183	446380
f12	2016-02-19	17:25	314182	446379
f12	2016-02-20	08:25	314182	446379
f12	2016-02-20	09:25	314183	446381
f12	2016-02-20	10:25	314183	446381
f12	2016-02-20	11:25	314185	446380
f12	2016-02-20	12:25	314184	446380
f12	2016-02-20	13:25	314184	446380
f12	2016-02-20	14:25	314184	446380
f12	2016-02-20	15:25	314184	446380
f12	2016-02-20	16:25	314184	446380
f12	2016-02-20	17:25	314184	446380
f12	2016-02-21	08:25	314184	446380
f12	2016-02-21	09:25	314183	446379
f12	2016-02-21	10:25	314183	446380
f12	2016-02-21	11:25	314183	446380
f12	2016-02-21	12:25	314183	446380
f12	2016-02-21	13:25	314186	446378
f12	2016-02-21	14:25	314185	446375
f12	2016-02-21	15:25	314184	446375
f12	2016-02-21	16:25	314184	446375
f12	2016-02-21	17:25	314184	446374
f12	2016-02-22	08:25	314184	446375
f12	2016-02-22	09:25	314184	446375
f12	2016-02-22	10:25	314184	446375
f12	2016-02-22	11:25	314184	446375
f12	2016-02-22	12:25	314184	446375
f12	2016-02-22	13:25	314184	446375
f12	2016-02-22	14:25	314189	446373
f12	2016-02-22	15:25	314189	446373
f12	2016-02-22	16:25	314189	446373
f12	2016-02-22	17:25	314190	446374
f12	2016-02-23	08:25	314190	446374
f12	2016-02-23	09:25	314189	446373
f12	2016-02-23	10:25	314189	446373
f12	2016-02-23	11:25	314189	446373
f12	2016-02-23	12:25	314189	446373
f12	2016-02-23	13:25	314189	446373
f12	2016-02-23	14:25	314189	446373
f12	2016-02-23	15:25	314188	446370
f12	2016-02-23	16:25	314188	446370
f12	2016-02-23	17:25	314188	446369
f12	2016-02-24	08:25	314189	446373
f12	2016-02-24	09:25	314189	446373
f12	2016-02-24	10:25	314189	446373
f12	2016-02-24	11:25	314189	446373
f12	2016-02-24	12:25	314189	446373
f12	2016-02-24	13:25	314189	446374
f12	2016-02-24	14:25	314189	446374
f12	2016-02-24	15:25	314189	446375
f12	2016-02-24	16:25	314189	446375
f12	2016-02-24	17:25	314189	446375
f12	2016-02-25	08:25	314193	446375
f12	2016-02-25	09:25	314193	446376
f12	2016-02-25	10:25	314193	446376
f12	2016-02-25	11:25	314193	446376
f12	2016-02-25	12:25	314193	446376
f12	2016-02-25	13:25	314193	446376
f12	2016-02-25	14:25	314193	446376
f12	2016-02-25	16:25	314193	446376
f12	2016-02-25	17:25	314193	446376
f12	2016-02-26	07:45	314193	446376
f12	2016-02-26	08:45	314193	446376
f12	2016-02-26	09:45	314193	446376
f12	2016-02-26	10:45	314193	446376
f12	2016-02-26	11:45	314193	446376
f12	2016-02-26	12:45	314193	446376
f12	2016-02-26	13:45	314193	446376
f12	2016-02-26	14:45	314193	446376
f12	2016-02-26	15:45	314193	446376
f12	2016-02-26	16:45	314193	446376
f12	2016-02-26	17:45	314193	446376
f13	2016-02-18	11:20	314193	446371
f13	2016-02-18	12:20	314188	446378
f13	2016-02-18	13:20	314192	446369
f13	2016-02-18	14:20	314197	446361
f13	2016-02-18	15:20	314196	446361
f13	2016-02-18	16:20	314196	446361
f13	2016-02-18	17:20	314196	446361
f13	2016-02-19	08:20	314197	446359
f13	2016-02-19	09:20	314197	446360
f13	2016-02-19	10:20	314197	446360
f13	2016-02-19	11:20	314197	446360
f13	2016-02-19	12:20	314197	446360
f13	2016-02-19	13:20	314197	446359
f13	2016-02-19	14:20	314196	446359
f13	2016-02-19	15:20	314196	446359
f13	2016-02-19	16:20	314196	446358
f13	2016-02-19	17:20	314198	446359
f13	2016-02-20	08:20	314197	446360
f13	2016-02-20	09:20	314197	446359
f13	2016-02-20	10:20	314198	446359
f13	2016-02-20	11:20	314198	446359
f13	2016-02-20	12:20	314198	446359
f13	2016-02-20	13:20	314198	446359
f13	2016-02-20	14:20	314198	446359
f13	2016-02-20	15:20	314198	446359
f13	2016-02-20	16:20	314198	446359
f13	2016-02-20	17:20	314198	446359
f13	2016-02-21	08:20	314195	446359
f13	2016-02-21	09:20	314195	446358
f13	2016-02-21	10:20	314194	446356
f13	2016-02-21	11:20	314189	446355
f13	2016-02-21	12:20	314189	446355
f13	2016-02-21	13:20	314189	446355
f13	2016-02-21	14:20	314189	446355
f13	2016-02-21	15:20	314189	446356
f13	2016-02-21	16:20	314189	446356
f13	2016-02-21	17:20	314187	446358
f13	2016-02-22	08:20	314188	446359
f13	2016-02-22	09:20	314188	446359
f13	2016-02-22	10:20	314188	446359
f13	2016-02-22	11:20	314188	446360
f13	2016-02-22	12:20	314189	446358
f13	2016-02-22	13:20	314189	446358
f13	2016-02-22	14:20	314188	446359
f13	2016-02-22	15:20	314188	446359
f13	2016-02-22	17:20	314184	446362
f13	2016-02-23	08:20	314184	446362
f13	2016-02-23	09:20	314189	446365
f13	2016-02-23	10:20	314193	446370
f13	2016-02-23	11:20	314193	446370
f13	2016-02-23	12:20	314192	446368
f13	2016-02-23	13:20	314191	446369
f13	2016-02-23	14:20	314190	446367
f13	2016-02-23	15:20	314190	446367
f13	2016-02-23	16:20	314190	446366
f13	2016-02-23	17:20	314190	446366
f13	2016-02-24	08:20	314190	446366
f13	2016-02-24	09:20	314190	446366
f13	2016-02-24	10:20	314190	446366
f13	2016-02-24	11:20	314190	446365
f13	2016-02-24	12:20	314190	446365
f13	2016-02-24	13:20	314190	446366
f13	2016-02-24	14:20	314190	446366
f13	2016-02-24	15:20	314190	446366
f13	2016-02-24	16:20	314187	446367
f13	2016-02-24	17:50	314182	446376
f13	2016-02-24	18:20	314183	446376
f13	2016-02-25	07:30	314185	446376
f13	2016-02-25	07:50	314185	446377
f13	2016-02-25	08:20	314185	446377
f13	2016-02-25	09:20	314183	446374
f13	2016-02-25	10:20	314183	446374
f13	2016-02-25	11:50	314190	446366
f14	2016-03-02	12:40	314178	446312
f14	2016-03-02	13:40	314176	446310
f14	2016-03-02	14:40	314176	446311
f14	2016-03-02	15:40	314176	446311
f14	2016-03-02	16:40	314176	446312
f14	2016-03-02	17:40	314176	446313
f14	2016-03-03	08:30	314176	446313
f14	2016-03-03	09:30	314176	446313
f14	2016-03-03	10:30	314176	446313
f14	2016-03-03	11:30	314176	446313
f14	2016-03-03	12:30	314176	446313
f14	2016-03-03	13:30	314176	446313
f14	2016-03-03	14:30	314176	446313
f14	2016-03-03	15:30	314176	446313
f14	2016-03-03	16:30	314176	446313
f14	2016-03-03	17:30	314174	446311
f14	2016-03-03	18:15	314173	446311
f14	2016-03-04	08:30	314173	446311
f14	2016-03-04	09:30	314173	446311
f14	2016-03-04	10:30	314173	446311
f14	2016-03-04	11:30	314172	446311
f14	2016-03-04	12:30	314172	446311
f14	2016-03-04	13:30	314173	446311
f14	2016-03-04	14:30	314173	446311
f14	2016-03-04	15:30	314173	446311
f14	2016-03-04	16:30	314173	446311
f14	2016-03-04	17:30	314173	446311
f14	2016-03-05	08:30	314172	446311
f14	2016-03-05	09:30	314172	446311
f14	2016-03-05	10:30	314173	446311
f14	2016-03-05	11:30	314172	446311
f14	2016-03-05	12:30	314172	446311
f14	2016-03-05	13:30	314172	446311
f14	2016-03-05	14:30	314172	446311
f14	2016-03-05	15:30	314172	446311
f14	2016-03-05	16:30	314172	446311
f14	2016-03-05	17:30	314172	446311
f14	2016-03-06	08:30	314173	446311
f14	2016-03-06	09:30	314173	446311
f14	2016-03-06	10:30	314173	446311
f14	2016-03-06	11:30	314173	446311
f14	2016-03-06	12:30	314173	446311
f14	2016-03-06	13:30	314173	446312
f14	2016-03-06	14:30	314173	446311
f14	2016-03-06	15:30	314173	446312
f14	2016-03-06	16:30	314173	446312
f14	2016-03-06	17:30	314173	446312
f14	2016-03-07	08:30	314173	446311
f14	2016-03-07	09:30	314173	446312
f14	2016-03-07	10:30	314173	446311
f14	2016-03-07	11:30	314173	446312
f14	2016-03-07	12:30	314173	446312
f14	2016-03-07	13:30	314173	446312
f14	2016-03-07	14:30	314173	446312
f14	2016-03-07	15:30	314173	446312
f14	2016-03-07	16:30	314173	446312
f14	2016-03-07	17:30	314173	446312
f14	2016-03-08	08:30	314173	446312
f14	2016-03-08	09:30	314173	446312
f14	2016-03-08	10:30	314173	446312
f14	2016-03-08	11:30	314173	446311
f14	2016-03-08	12:30	314173	446312
f14	2016-03-08	13:30	314173	446312
f14	2016-03-08	14:30	314173	446312
f14	2016-03-08	15:30	314173	446312
f14	2016-03-08	16:30	314174	446312
f14	2016-03-08	17:30	314174	446311
f14	2016-03-09	08:30	314174	446311
f14	2016-03-09	09:30	314174	446312
f14	2016-03-09	10:30	314173	446312
f14	2016-03-09	11:30	314174	446312
f14	2016-03-09	12:30	314173	446312
f14	2016-03-09	13:30	314173	446312
f14	2016-03-09	14:30	314177	446312
f14	2016-03-09	15:30	314177	446312
f14	2016-03-09	16:30	314177	446312
f14	2016-03-09	17:30	314177	446312
f14	2016-03-10	08:30	314177	446311
f14	2016-03-10	09:30	314181	446317
f14	2016-03-10	10:30	314181	446317
f14	2016-03-10	11:30	314181	446317
f14	2016-03-10	12:30	314182	446317
f14	2016-03-10	13:30	314182	446317
f14	2016-03-10	14:30	314182	446318
f14	2016-03-10	15:30	314182	446317
f14	2016-03-10	16:30	314182	446317
f14	2016-03-10	17:30	314181	446322
f14	2016-03-11	07:30	314176	446323
f14	2016-03-11	08:30	314177	446323
f14	2016-03-11	09:30	314176	446323
f14	2016-03-11	10:30	314177	446323
f14	2016-03-11	11:30	314176	446323
f14	2016-03-11	12:30	314177	446323
f14	2016-03-11	13:30	314176	446323
f14	2016-03-11	14:30	314177	446323
f14	2016-03-11	15:30	314179	446326
f14	2016-03-11	16:30	314179	446326
f14	2016-03-11	17:30	314179	446326
f14	2016-03-12	08:30	314179	446326
f14	2016-03-12	09:30	314180	446323
f14	2016-03-12	10:30	314180	446322
f14	2016-03-12	11:30	314183	446323
f14	2016-03-12	12:30	314178	446323
f14	2016-03-12	13:30	314174	446304
f14	2016-03-12	14:30	314174	446304
f14	2016-03-12	15:30	314177	446306
f14	2016-03-13	12:25	314182	446318
f14	2016-03-13	13:25	314182	446317
f14	2016-03-13	14:25	314182	446318
f14	2016-03-13	15:25	314182	446318
f14	2016-03-13	16:25	314182	446318
f14	2016-03-13	17:25	314182	446318
f14	2016-03-14	08:30	314182	446317
f14	2016-03-14	09:30	314182	446318
f14	2016-03-14	10:30	314182	446318
f14	2016-03-14	11:30	314182	446317
f14	2016-03-14	12:30	314182	446317
f14	2016-03-14	13:30	314182	446318
f14	2016-03-14	14:30	314182	446317
f14	2016-03-14	15:30	314182	446317
f14	2016-03-14	16:30	314182	446318
f14	2016-03-14	17:30	314182	446318
f14	2016-03-15	08:30	314182	446318
f14	2016-03-15	09:30	314182	446318
f14	2016-03-15	10:30	314182	446318
f14	2016-03-15	11:30	314182	446318
f14	2016-03-15	12:30	314182	446318
f14	2016-03-15	13:30	314182	446317
f14	2016-03-15	14:30	314182	446317
f14	2016-03-15	15:30	314182	446318
f14	2016-03-15	16:30	314182	446318
f14	2016-03-15	17:30	314182	446318
f14	2016-03-16	08:30	314182	446318
f14	2016-03-16	09:30	314182	446318
f14	2016-03-16	10:30	314182	446318
f14	2016-03-16	11:30	314182	446317
f14	2016-03-16	12:30	314182	446318
f14	2016-03-16	13:30	314182	446318
f14	2016-03-16	14:30	314182	446318
f14	2016-03-16	15:30	314182	446318
f14	2016-03-16	16:27	314182	446317
f14	2016-03-16	17:39	314182	446318
f14	2016-03-17	08:30	314182	446318
f14	2016-03-17	09:30	314182	446318
f14	2016-03-17	10:30	314182	446318
f14	2016-03-17	11:30	314182	446318
f14	2016-03-17	12:30	314182	446318
f14	2016-03-17	13:30	314182	446318
f14	2016-03-17	14:30	314182	446318
f14	2016-03-17	15:30	314181	446318
f14	2016-03-17	16:30	314181	446318
f14	2016-03-17	17:30	314181	446318
f14	2016-03-17	18:00	314181	446318
f14	2016-03-18	07:15	314179	446314
f15	2016-03-02	12:50	314170	446323
f15	2016-03-02	13:50	314171	446324
f15	2016-03-02	14:50	314171	446323
f15	2016-03-02	15:50	314171	446323
f15	2016-03-02	16:50	314171	446324
f15	2016-03-02	17:50	314171	446324
f15	2016-03-03	08:35	314171	446324
f15	2016-03-03	09:35	314171	446324
f15	2016-03-03	10:35	314171	446324
f15	2016-03-03	11:35	314171	446324
f15	2016-03-03	12:35	314171	446324
f15	2016-03-03	13:35	314171	446324
f15	2016-03-03	14:35	314171	446324
f15	2016-03-03	15:35	314171	446324
f15	2016-03-03	16:35	314170	446323
f15	2016-03-03	17:35	314172	446322
f15	2016-03-03	18:20	314172	446322
f15	2016-03-04	08:35	314172	446322
f15	2016-03-04	09:35	314173	446322
f15	2016-03-04	10:35	314172	446322
f15	2016-03-04	11:35	314173	446322
f15	2016-03-04	12:35	314173	446323
f15	2016-03-04	13:35	314172	446323
f15	2016-03-04	14:35	314171	446322
f15	2016-03-04	15:35	314170	446323
f15	2016-03-04	16:35	314170	446323
f15	2016-03-04	17:35	314171	446323
f15	2016-03-05	08:35	314173	446323
f15	2016-03-05	09:35	314173	446322
f15	2016-03-05	10:35	314173	446322
f15	2016-03-05	11:35	314173	446322
f15	2016-03-05	12:35	314172	446322
f15	2016-03-05	13:35	314173	446322
f15	2016-03-05	14:35	314173	446322
f15	2016-03-05	15:35	314173	446322
f15	2016-03-05	16:35	314173	446322
f15	2016-03-05	17:35	314173	446322
f15	2016-03-05	18:05	314173	446322
f15	2016-03-06	08:35	314172	446323
f15	2016-03-06	09:35	314172	446323
f15	2016-03-06	10:35	314171	446323
f15	2016-03-06	11:35	314172	446322
f15	2016-03-06	12:35	314172	446322
f15	2016-03-06	13:35	314172	446322
f15	2016-03-06	14:35	314172	446322
f15	2016-03-06	15:35	314172	446322
f15	2016-03-06	16:35	314172	446322
f15	2016-03-06	17:35	314172	446323
f15	2016-03-07	08:35	314172	446322
f15	2016-03-07	09:35	314173	446322
f15	2016-03-07	10:35	314172	446322
f15	2016-03-07	11:35	314172	446322
f15	2016-03-07	12:35	314172	446322
f15	2016-03-07	13:35	314172	446322
f15	2016-03-07	14:35	314173	446322
f15	2016-03-07	15:35	314173	446322
f15	2016-03-07	16:35	314173	446322
f15	2016-03-07	17:35	314173	446322
f15	2016-03-08	08:35	314173	446322
f15	2016-03-08	09:35	314172	446323
f15	2016-03-08	10:35	314173	446322
f15	2016-03-08	11:35	314172	446322
f15	2016-03-08	12:30	314172	446322
f15	2016-03-08	13:35	314172	446322
f15	2016-03-08	14:35	314172	446322
f15	2016-03-08	15:35	314173	446322
f15	2016-03-08	17:35	314172	446322
f15	2016-03-09	08:35	314173	446322
f15	2016-03-09	09:35	314172	446322
f15	2016-03-09	10:35	314172	446322
f15	2016-03-09	11:35	314172	446322
f15	2016-03-09	12:35	314173	446322
f15	2016-03-09	13:35	314173	446322
f15	2016-03-09	14:35	314171	446323
f15	2016-03-09	15:35	314171	446323
f15	2016-03-09	16:35	314171	446323
f15	2016-03-09	17:35	314171	446323
f15	2016-03-10	08:35	314172	446322
f15	2016-03-10	09:35	314173	446322
f15	2016-03-10	10:35	314172	446322
f15	2016-03-10	11:35	314172	446323
f15	2016-03-10	12:35	314173	446322
f15	2016-03-10	13:35	314173	446322
f15	2016-03-10	14:35	314177	446323
f15	2016-03-10	15:35	314177	446323
f15	2016-03-10	16:35	314177	446323
f15	2016-03-10	17:35	314177	446323
f15	2016-03-11	07:35	314183	446323
f15	2016-03-11	08:35	314181	446323
f15	2016-03-11	09:35	314181	446323
f15	2016-03-11	10:35	314181	446323
f15	2016-03-11	11:35	314181	446323
f15	2016-03-11	12:35	314181	446323
f15	2016-03-11	13:35	314181	446323
f15	2016-03-11	14:35	314181	446323
f15	2016-03-11	16:35	314181	446323
f15	2016-03-11	17:35	314181	446323
f15	2016-03-12	08:35	314173	446324
f15	2016-03-12	09:35	314173	446324
f15	2016-03-12	10:35	314172	446323
f15	2016-03-12	11:35	314173	446323
f15	2016-03-12	12:35	314172	446323
f15	2016-03-12	13:35	314172	446323
f15	2016-03-12	14:35	314173	446323
f15	2016-03-12	15:35	314173	446322
f15	2016-03-12	16:35	314173	446323
f15	2016-03-12	17:35	314173	446322
f15	2016-03-13	08:35	314181	446325
f15	2016-03-13	09:35	314180	446325
f15	2016-03-13	10:35	314181	446323
f15	2016-03-13	11:35	314181	446322
f15	2016-03-13	12:35	314181	446319
f15	2016-03-13	13:35	314181	446319
f15	2016-03-13	14:35	314181	446319
f15	2016-03-13	15:35	314181	446319
f15	2016-03-13	16:35	314181	446319
f15	2016-03-13	17:35	314181	446319
f15	2016-03-14	08:35	314181	446319
f15	2016-03-14	09:35	314180	446319
f15	2016-03-14	10:35	314181	446319
f15	2016-03-14	11:35	314181	446319
f15	2016-03-14	12:35	314181	446319
f15	2016-03-14	13:35	314181	446319
f15	2016-03-14	14:35	314181	446319
f15	2016-03-14	15:35	314181	446319
f15	2016-03-14	16:35	314181	446319
f15	2016-03-14	17:35	314181	446319
f15	2016-03-15	08:35	314181	446319
f15	2016-03-15	09:35	314174	446319
f15	2016-03-15	10:35	314171	446322
f15	2016-03-15	11:35	314172	446322
f15	2016-03-15	12:35	314172	446322
f15	2016-03-15	13:35	314172	446322
f15	2016-03-15	14:35	314172	446322
f15	2016-03-15	15:35	314172	446322
f15	2016-03-15	16:35	314171	446322
f15	2016-03-15	17:35	314171	446322
f15	2016-03-16	08:35	314172	446322
f15	2016-03-16	09:35	314171	446323
f15	2016-03-16	10:35	314170	446323
f15	2016-03-16	11:35	314170	446323
f15	2016-03-16	12:35	314171	446323
f15	2016-03-16	13:35	314171	446323
f15	2016-03-16	14:35	314171	446323
f15	2016-03-16	15:35	314171	446323
f15	2016-03-16	16:31	314171	446323
f15	2016-03-16	17:41	314172	446323
f15	2016-03-17	08:35	314173	446323
f15	2016-03-17	09:35	314172	446322
f15	2016-03-17	10:35	314173	446322
f15	2016-03-17	11:35	314172	446322
f15	2016-03-17	12:35	314172	446322
f15	2016-03-17	13:35	314172	446322
f15	2016-03-17	14:35	314168	446316
f15	2016-03-17	15:35	314166	446314
f15	2016-03-17	16:35	314165	446313
f15	2016-03-17	17:35	314166	446314
f15	2016-03-18	07:20	314167	446314
f15	2016-03-18	08:35	314165	446313
f16	2016-03-02	14:30	314182	446306
f16	2016-03-02	15:30	314183	446305
f16	2016-03-02	16:30	314183	446305
f16	2016-03-02	17:30	314183	446305
f16	2016-03-03	08:25	314183	446305
f16	2016-03-03	09:25	314183	446305
f16	2016-03-03	10:25	314183	446305
f16	2016-03-03	11:25	314183	446305
f16	2016-03-03	12:25	314183	446305
f16	2016-03-03	13:25	314185	446305
f16	2016-03-03	14:25	314185	446305
f16	2016-03-03	15:25	314185	446305
f16	2016-03-03	16:25	314185	446305
f16	2016-03-03	17:25	314185	446304
f16	2016-03-03	18:10	314187	446300
f16	2016-03-04	08:25	314187	446300
f16	2016-03-04	09:25	314185	446305
f16	2016-03-04	10:25	314187	446300
f16	2016-03-04	11:25	314187	446300
f16	2016-03-04	12:25	314187	446300
f16	2016-03-04	13:25	314187	446300
f16	2016-03-04	14:25	314183	446303
f16	2016-03-04	15:25	314182	446304
f16	2016-03-04	16:25	314182	446304
f16	2016-03-04	17:25	314182	446304
f16	2016-03-05	08:25	314182	446304
f16	2016-03-05	09:25	314182	446304
f16	2016-03-05	10:25	314182	446304
f16	2016-03-05	11:25	314182	446304
f16	2016-03-05	12:25	314182	446304
f16	2016-03-05	13:25	314183	446304
f16	2016-03-05	14:25	314183	446304
f16	2016-03-05	15:25	314190	446319
f16	2016-03-05	16:25	314194	446323
f16	2016-03-05	17:25	314193	446321
f16	2016-03-06	09:25	314192	446320
f16	2016-03-06	10:25	314185	446308
f16	2016-03-06	11:25	314185	446309
f16	2016-03-06	12:25	314185	446309
f16	2016-03-06	13:25	314185	446308
f16	2016-03-06	14:25	314182	446304
f16	2016-03-06	15:25	314183	446304
f16	2016-03-06	16:25	314182	446304
f16	2016-03-06	17:25	314182	446304
f16	2016-03-07	08:25	314183	446304
f16	2016-03-07	09:25	314183	446302
f16	2016-03-07	10:25	314185	446300
f16	2016-03-07	11:25	314185	446300
f16	2016-03-07	12:25	314185	446300
f16	2016-03-07	13:25	314185	446300
f16	2016-03-07	14:25	314185	446300
f16	2016-03-07	15:25	314186	446300
f16	2016-03-07	16:25	314187	446300
f16	2016-03-07	17:25	314187	446300
f16	2016-03-08	08:25	314187	446300
f16	2016-03-08	09:25	314187	446300
f16	2016-03-08	10:25	314187	446300
f16	2016-03-08	11:25	314187	446300
f16	2016-03-08	12:25	314187	446300
f16	2016-03-08	13:25	314187	446300
f16	2016-03-08	14:25	314187	446300
f16	2016-03-08	15:25	314187	446300
f16	2016-03-08	16:25	314187	446300
f16	2016-03-08	17:25	314187	446300
f16	2016-03-09	08:25	314187	446300
f16	2016-03-09	09:25	314187	446301
f16	2016-03-09	10:25	314187	446300
f16	2016-03-09	11:25	314187	446300
f16	2016-03-09	12:25	314187	446300
f16	2016-03-09	13:25	314187	446300
f16	2016-03-09	14:25	314180	446299
f16	2016-03-09	15:25	314180	446299
f16	2016-03-10	08:25	314196	446297
f16	2016-03-10	09:25	314198	446296
f16	2016-03-10	10:25	314198	446296
f16	2016-03-10	11:25	314198	446296
f16	2016-03-10	12:25	314200	446295
f16	2016-03-10	13:25	314199	446296
f16	2016-03-10	14:25	314199	446297
f16	2016-03-10	15:25	314199	446297
f16	2016-03-10	16:25	314197	446295
f16	2016-03-10	17:25	314197	446295
f16	2016-03-11	08:25	314196	446294
f16	2016-03-11	09:25	314196	446294
f16	2016-03-11	10:25	314195	446293
f16	2016-03-11	13:25	314190	446284
f16	2016-03-11	14:25	314190	446284
f16	2016-03-11	15:25	314190	446284
f16	2016-03-11	16:25	314190	446284
f16	2016-03-11	17:25	314190	446284
f16	2016-03-12	08:25	314192	446284
f16	2016-03-12	09:25	314192	446284
f16	2016-03-12	10:25	314192	446284
f16	2016-03-12	11:25	314192	446284
f16	2016-03-12	12:25	314192	446284
f16	2016-03-12	13:25	314192	446284
f16	2016-03-12	14:25	314189	446284
f16	2016-03-12	15:25	314189	446284
f16	2016-03-12	16:25	314188	446284
f16	2016-03-12	17:25	314190	446284
f16	2016-03-13	08:30	314188	446287
f16	2016-03-13	09:30	314188	446295
f16	2016-03-13	10:30	314188	446295
f16	2016-03-13	11:30	314188	446297
f16	2016-03-13	12:30	314188	446298
f16	2016-03-13	13:30	314188	446298
f16	2016-03-13	14:30	314188	446298
f16	2016-03-13	15:30	314188	446296
f16	2016-03-13	16:30	314189	446297
f16	2016-03-13	17:30	314189	446297
f16	2016-03-14	08:25	314187	446300
f16	2016-03-14	09:25	314187	446300
f16	2016-03-14	10:25	314187	446300
f16	2016-03-14	11:25	314187	446300
f16	2016-03-14	12:25	314187	446300
f16	2016-03-14	13:25	314187	446300
f16	2016-03-14	14:25	314187	446300
f16	2016-03-14	15:25	314187	446300
f16	2016-03-14	16:25	314187	446300
f16	2016-03-14	17:25	314187	446300
f16	2016-03-15	08:25	314187	446300
f16	2016-03-15	09:25	314187	446300
f16	2016-03-15	10:25	314187	446300
f16	2016-03-15	11:25	314187	446300
f16	2016-03-15	12:25	314187	446300
f16	2016-03-15	13:25	314187	446300
f16	2016-03-15	14:25	314187	446300
f16	2016-03-15	15:25	314187	446300
f16	2016-03-15	16:25	314187	446300
f16	2016-03-15	17:25	314187	446300
f16	2016-03-16	08:25	314187	446300
f16	2016-03-16	09:25	314187	446300
f16	2016-03-16	10:25	314187	446300
f16	2016-03-16	11:25	314187	446300
f16	2016-03-16	12:25	314187	446300
f16	2016-03-16	13:25	314187	446300
f16	2016-03-16	14:20	314187	446300
f16	2016-03-16	15:25	314187	446300
f16	2016-03-16	16:25	314187	446300
f16	2016-03-16	17:35	314193	446304
f16	2016-03-16	18:30	314195	446304
f16	2016-03-17	08:25	314195	446304
f16	2016-03-17	09:25	314195	446304
f16	2016-03-17	10:25	314195	446304
f16	2016-03-17	11:25	314195	446304
f16	2016-03-17	12:25	314195	446304
f16	2016-03-17	13:25	314195	446304
f16	2016-03-17	14:25	314195	446304
f16	2016-03-17	15:25	314195	446315
f16	2016-03-17	16:25	314193	446321
f16	2016-03-17	17:25	314192	446321
f16	2016-03-18	07:10	314193	446322
f16	2016-03-18	08:25	314191	446315
f16	2016-03-18	09:25	314181	446308
f16	2016-03-18	10:25	314181	446308
f16	2016-03-18	11:25	314181	446308
f16	2016-03-18	12:25	314181	446308
f16	2016-03-18	13:25	314183	446303
f16	2016-03-18	14:25	314183	446305
f16	2016-03-18	15:25	314183	446305
f16	2016-03-18	16:25	314183	446305
f16	2016-03-18	17:25	314183	446305
f16	2016-03-18	18:25	314184	446305
f17	2016-03-02	17:00	314186	446345
f17	2016-03-02	18:00	314186	446345
f17	2016-03-03	08:20	314188	446344
f17	2016-03-03	09:20	314188	446344
f17	2016-03-03	10:20	314188	446344
f17	2016-03-03	11:20	314188	446344
f17	2016-03-03	12:20	314188	446344
f17	2016-03-03	13:20	314188	446344
f17	2016-03-03	14:20	314188	446344
f17	2016-03-03	15:20	314188	446344
f17	2016-03-03	16:20	314188	446344
f17	2016-03-03	17:20	314188	446344
f17	2016-03-03	18:05	314187	446343
f17	2016-03-04	08:15	314184	446345
f17	2016-03-04	09:15	314184	446345
f17	2016-03-04	10:15	314184	446345
f17	2016-03-04	11:15	314184	446345
f17	2016-03-04	12:15	314184	446344
f17	2016-03-04	13:15	314184	446344
f17	2016-03-04	14:15	314184	446344
f17	2016-03-04	15:15	314184	446344
f17	2016-03-04	16:15	314183	446344
f17	2016-03-04	17:15	314187	446344
f17	2016-03-05	08:15	314190	446342
f17	2016-03-05	09:15	314190	446342
f17	2016-03-05	10:15	314190	446342
f17	2016-03-05	11:15	314190	446342
f17	2016-03-05	12:15	314190	446342
f17	2016-03-05	13:15	314190	446342
f17	2016-03-05	14:15	314190	446342
f17	2016-03-05	15:15	314191	446342
f17	2016-03-05	16:15	314191	446342
f17	2016-03-05	17:15	314191	446342
f17	2016-03-06	08:15	314188	446343
f17	2016-03-06	09:15	314188	446344
f17	2016-03-06	10:15	314188	446344
f17	2016-03-06	11:15	314188	446344
f17	2016-03-06	12:15	314187	446344
f17	2016-03-06	13:15	314188	446343
f17	2016-03-06	14:15	314188	446344
f17	2016-03-06	15:15	314187	446344
f17	2016-03-06	16:15	314188	446344
f17	2016-03-06	17:15	314186	446343
f17	2016-03-07	08:15	314187	446343
f17	2016-03-07	09:15	314186	446343
f17	2016-03-07	10:15	314187	446343
f17	2016-03-07	11:15	314187	446343
f17	2016-03-07	12:15	314187	446343
f17	2016-03-07	13:15	314188	446344
f17	2016-03-07	14:15	314188	446344
f17	2016-03-07	15:15	314188	446344
f17	2016-03-07	16:15	314188	446344
f17	2016-03-07	17:15	314188	446344
f17	2016-03-08	08:15	314186	446343
f18	2016-03-03	13:40	314152	446327
f18	2016-03-03	14:40	314152	446327
f18	2016-03-03	15:40	314152	446327
f18	2016-03-03	16:40	314152	446327
f18	2016-03-03	17:40	314152	446327
f18	2016-03-03	18:25	314152	446327
f18	2016-03-04	08:40	314152	446326
f18	2016-03-04	09:40	314150	446326
f18	2016-03-04	10:40	314149	446326
f18	2016-03-04	11:40	314148	446326
f18	2016-03-04	12:40	314149	446326
f18	2016-03-04	13:40	314149	446326
f18	2016-03-04	14:40	314149	446326
f18	2016-03-04	15:40	314148	446326
f18	2016-03-04	16:40	314148	446326
f18	2016-03-04	17:40	314149	446326
f18	2016-03-05	08:40	314149	446326
f18	2016-03-05	09:40	314149	446326
f18	2016-03-05	10:40	314149	446326
f18	2016-03-05	11:40	314149	446326
f18	2016-03-05	12:40	314149	446326
f18	2016-03-05	13:45	314149	446326
f18	2016-03-05	14:40	314149	446326
f18	2016-03-05	15:40	314149	446326
f18	2016-03-05	16:40	314149	446326
f18	2016-03-05	17:40	314149	446326
f18	2016-03-05	18:10	314149	446326
f18	2016-03-06	08:45	314149	446326
f18	2016-03-06	09:45	314149	446326
f18	2016-03-06	10:45	314149	446326
f18	2016-03-06	11:45	314149	446326
f18	2016-03-06	12:45	314149	446326
f18	2016-03-06	13:45	314149	446326
f18	2016-03-06	14:45	314149	446326
f18	2016-03-06	15:45	314149	446326
f18	2016-03-06	16:45	314149	446326
f18	2016-03-06	17:45	314149	446326
f18	2016-03-07	08:45	314149	446326
f18	2016-03-07	09:45	314149	446326
f18	2016-03-07	10:45	314149	446326
f18	2016-03-07	11:45	314149	446326
f18	2016-03-07	12:45	314149	446326
f18	2016-03-07	13:45	314149	446326
f18	2016-03-07	14:45	314149	446326
f18	2016-03-07	15:45	314149	446326
f18	2016-03-07	16:45	314149	446326
f18	2016-03-07	17:45	314149	446326
f18	2016-03-08	08:45	314148	446324
f18	2016-03-08	09:45	314148	446324
f18	2016-03-08	12:45	314148	446324
f18	2016-03-08	13:45	314148	446324
f18	2016-03-08	14:45	314148	446324
f18	2016-03-08	15:45	314148	446325
f18	2016-03-08	16:45	314148	446324
f18	2016-03-08	17:45	314147	446325
f18	2016-03-09	08:45	314146	446328
f18	2016-03-09	09:45	314146	446327
f18	2016-03-09	10:45	314146	446327
f18	2016-03-09	11:45	314146	446328
f18	2016-03-09	12:45	314146	446328
f18	2016-03-09	13:45	314146	446328
f18	2016-03-09	14:45	314147	446328
f18	2016-03-09	15:45	314149	446328
f18	2016-03-09	16:45	314149	446329
f18	2016-03-09	17:45	314149	446329
f18	2016-03-10	08:45	314151	446329
f18	2016-03-10	09:45	314151	446329
f18	2016-03-10	10:45	314152	446329
f18	2016-03-10	11:45	314152	446329
f18	2016-03-10	12:45	314151	446329
f18	2016-03-10	13:45	314151	446329
f18	2016-03-10	14:45	314151	446329
f18	2016-03-10	15:45	314152	446328
f18	2016-03-10	16:45	314157	446329
f18	2016-03-10	17:45	314157	446329
f18	2016-03-11	07:45	314157	446330
f18	2016-03-11	08:45	314158	446330
f18	2016-03-11	09:45	314160	446332
f18	2016-03-11	10:45	314159	446330
f18	2016-03-11	11:45	314153	446329
f18	2016-03-11	12:45	314153	446329
f18	2016-03-11	13:45	314153	446329
f18	2016-03-11	14:45	314153	446329
f18	2016-03-11	15:45	314153	446329
f18	2016-03-11	16:45	314153	446329
f18	2016-03-11	17:45	314153	446329
f18	2016-03-12	08:45	314152	446330
f18	2016-03-12	09:45	314152	446330
f18	2016-03-12	10:45	314152	446330
f18	2016-03-12	11:45	314152	446330
f18	2016-03-12	12:45	314152	446330
f18	2016-03-12	13:45	314152	446330
f18	2016-03-12	14:45	314152	446330
f18	2016-03-12	15:45	314152	446330
f18	2016-03-12	16:45	314152	446330
f18	2016-03-12	17:45	314152	446330
f18	2016-03-13	08:45	314151	446329
f18	2016-03-13	09:45	314151	446329
f18	2016-03-13	10:45	314151	446328
f18	2016-03-13	11:45	314152	446328
f18	2016-03-13	12:45	314151	446326
f18	2016-03-13	13:45	314152	446326
f18	2016-03-13	14:45	314152	446327
f18	2016-03-13	15:45	314152	446328
f18	2016-03-13	16:45	314151	446328
f18	2016-03-13	17:45	314151	446330
f18	2016-03-14	08:45	314150	446328
f18	2016-03-14	09:45	314150	446328
f18	2016-03-14	10:45	314150	446328
f18	2016-03-14	11:45	314150	446328
f18	2016-03-14	12:45	314150	446328
f18	2016-03-14	13:45	314150	446328
f18	2016-03-14	14:45	314150	446328
f18	2016-03-14	15:45	314149	446328
f18	2016-03-14	16:45	314149	446328
f18	2016-03-14	17:45	314150	446327
f18	2016-03-15	08:45	314150	446327
f18	2016-03-15	09:45	314151	446328
f18	2016-03-15	10:45	314151	446328
f18	2016-03-15	11:45	314151	446329
f18	2016-03-15	12:45	314151	446328
f18	2016-03-15	13:45	314151	446329
f18	2016-03-15	14:45	314151	446329
f18	2016-03-15	15:45	314151	446329
f18	2016-03-15	16:45	314151	446329
f18	2016-03-15	17:45	314151	446329
f18	2016-03-16	08:45	314151	446333
f18	2016-03-16	09:45	314151	446329
f18	2016-03-16	10:45	314151	446329
f18	2016-03-16	11:45	314151	446329
f18	2016-03-16	12:45	314151	446329
f18	2016-03-16	13:45	314151	446329
f18	2016-03-16	14:45	314151	446328
f18	2016-03-16	15:45	314151	446329
f18	2016-03-16	16:37	314150	446329
f18	2016-03-16	17:45	314150	446329
f18	2016-03-17	08:45	314151	446329
f18	2016-03-17	09:45	314151	446329
f18	2016-03-17	10:45	314151	446329
f18	2016-03-17	11:45	314152	446329
f18	2016-03-17	12:45	314152	446330
f18	2016-03-17	13:45	314152	446330
f18	2016-03-17	14:45	314152	446330
f18	2016-03-17	15:45	314152	446330
f18	2016-03-17	16:45	314153	446330
f18	2016-03-17	17:45	314155	446329
f18	2016-03-17	18:15	314155	446329
f18	2016-03-18	07:30	314155	446329
f19	2016-03-03	15:15	314195	446333
f19	2016-03-03	16:15	314195	446333
f19	2016-03-03	17:15	314195	446333
f19	2016-03-03	18:00	314195	446333
f19	2016-03-04	08:20	314195	446333
f19	2016-03-04	09:20	314195	446333
f19	2016-03-04	10:20	314195	446333
f19	2016-03-04	11:20	314195	446333
f19	2016-03-04	12:20	314195	446333
f19	2016-03-04	13:20	314195	446333
f19	2016-03-04	14:20	314195	446333
f19	2016-03-04	15:20	314195	446333
f19	2016-03-04	16:20	314195	446333
f19	2016-03-04	17:20	314195	446333
f19	2016-03-05	08:20	314196	446333
f19	2016-03-05	09:20	314196	446332
f19	2016-03-05	10:20	314192	446329
f19	2016-03-05	11:20	314192	446329
f19	2016-03-05	12:20	314192	446329
f19	2016-03-05	13:20	314192	446329
f19	2016-03-05	14:20	314192	446329
f19	2016-03-05	15:20	314192	446329
f19	2016-03-05	16:20	314192	446329
f19	2016-03-05	17:20	314191	446329
f19	2016-03-06	08:20	314191	446329
f19	2016-03-06	09:20	314191	446329
f19	2016-03-06	10:20	314188	446329
f19	2016-03-06	11:20	314188	446329
f19	2016-03-06	12:20	314188	446329
f19	2016-03-06	13:20	314188	446329
f19	2016-03-06	14:20	314187	446329
f19	2016-03-06	15:20	314187	446330
f19	2016-03-06	16:20	314187	446330
f19	2016-03-06	17:20	314187	446330
f19	2016-03-07	08:20	314187	446329
f19	2016-03-07	09:20	314187	446330
f19	2016-03-07	10:20	314187	446329
f19	2016-03-07	11:20	314187	446329
f19	2016-03-07	12:20	314187	446329
f19	2016-03-07	13:20	314187	446329
f19	2016-03-07	14:20	314187	446329
f19	2016-03-07	15:20	314187	446329
f19	2016-03-07	16:20	314187	446329
f19	2016-03-07	17:20	314187	446329
f19	2016-03-08	08:20	314187	446329
f19	2016-03-08	09:20	314187	446330
f19	2016-03-08	10:20	314187	446329
f19	2016-03-08	11:20	314187	446330
f19	2016-03-08	12:20	314187	446329
f19	2016-03-08	13:20	314187	446330
f19	2016-03-08	14:20	314187	446330
f19	2016-03-08	15:20	314187	446330
f19	2016-03-08	16:20	314187	446330
f19	2016-03-08	17:20	314187	446330
f19	2016-03-09	08:20	314187	446329
f19	2016-03-09	09:20	314186	446328
f19	2016-03-09	10:20	314186	446328
f19	2016-03-09	11:20	314186	446328
f19	2016-03-09	12:20	314186	446329
f19	2016-03-09	13:20	314186	446328
f19	2016-03-09	14:20	314186	446329
f19	2016-03-09	15:20	314187	446328
f19	2016-03-09	16:20	314186	446329
f19	2016-03-09	17:20	314186	446329
f19	2016-03-10	08:20	314188	446327
f19	2016-03-10	09:20	314188	446327
f19	2016-03-10	10:20	314188	446327
f19	2016-03-10	11:20	314188	446327
f19	2016-03-10	12:20	314188	446327
f19	2016-03-10	13:20	314188	446327
f19	2016-03-10	14:20	314188	446327
f19	2016-03-10	15:20	314188	446328
f19	2016-03-10	16:20	314188	446327
f19	2016-03-10	17:20	314188	446327
f19	2016-03-11	08:20	314188	446327
f19	2016-03-11	09:20	314188	446327
f19	2016-03-11	10:20	314188	446327
f19	2016-03-11	11:20	314188	446327
f19	2016-03-11	12:20	314188	446327
f19	2016-03-11	13:20	314188	446327
f19	2016-03-11	14:20	314188	446327
f19	2016-03-11	15:20	314188	446327
f19	2016-03-11	16:20	314188	446327
f19	2016-03-11	17:20	314188	446327
f19	2016-03-12	08:20	314188	446327
f19	2016-03-12	09:20	314188	446327
f19	2016-03-12	10:20	314188	446327
f19	2016-03-12	12:20	314188	446327
f19	2016-03-12	13:20	314188	446327
f19	2016-03-12	16:20	314188	446327
f19	2016-03-12	17:20	314188	446327
f20	2016-03-04	09:45	314144	446337
f20	2016-03-04	10:45	314143	446337
f20	2016-03-04	11:45	314143	446337
f20	2016-03-04	12:45	314143	446337
f20	2016-03-04	13:45	314143	446337
f20	2016-03-04	14:45	314143	446337
f20	2016-03-04	15:45	314143	446337
f20	2016-03-04	16:45	314143	446337
f20	2016-03-04	17:45	314143	446337
f20	2016-03-05	08:45	314144	446337
f20	2016-03-05	09:45	314144	446337
f20	2016-03-05	10:45	314144	446337
f20	2016-03-05	11:45	314144	446337
f20	2016-03-05	12:45	314144	446337
f20	2016-03-05	13:45	314144	446337
f20	2016-03-05	14:45	314144	446337
f20	2016-03-05	15:45	314144	446337
f20	2016-03-05	16:45	314144	446337
f20	2016-03-05	17:45	314145	446338
f20	2016-03-05	18:15	314145	446339
f20	2016-03-06	08:50	314145	446339
f20	2016-03-06	09:50	314145	446339
f20	2016-03-06	10:50	314145	446341
f20	2016-03-06	11:50	314143	446337
f20	2016-03-06	12:50	314143	446337
f20	2016-03-06	13:50	314143	446337
f20	2016-03-06	14:50	314143	446337
f20	2016-03-06	15:50	314143	446337
f20	2016-03-06	16:50	314143	446337
f20	2016-03-06	17:50	314143	446337
f20	2016-03-07	08:50	314143	446337
f20	2016-03-07	09:50	314143	446337
f20	2016-03-07	10:50	314143	446337
f20	2016-03-07	11:50	314143	446337
f20	2016-03-07	12:50	314143	446337
f20	2016-03-07	13:50	314143	446337
f20	2016-03-07	14:50	314143	446337
f20	2016-03-07	15:50	314143	446337
f20	2016-03-07	16:50	314143	446337
f20	2016-03-07	17:50	314143	446337
f20	2016-03-08	08:50	314142	446337
f20	2016-03-08	09:50	314142	446337
f20	2016-03-08	10:50	314142	446337
f20	2016-03-08	11:50	314142	446337
f20	2016-03-08	12:50	314142	446337
f20	2016-03-08	13:50	314142	446337
f20	2016-03-08	14:50	314142	446337
f20	2016-03-08	15:50	314142	446337
f20	2016-03-08	16:50	314142	446337
f20	2016-03-08	17:50	314142	446336
f20	2016-03-09	08:50	314141	446336
f20	2016-03-09	09:50	314141	446336
f20	2016-03-09	10:50	314141	446337
f20	2016-03-09	12:50	314142	446337
f20	2016-03-09	13:50	314142	446337
f20	2016-03-09	14:50	314142	446338
f20	2016-03-09	15:50	314141	446337
f20	2016-03-09	16:50	314141	446336
f20	2016-03-09	17:50	314143	446335
f20	2016-03-10	08:50	314162	446332
f20	2016-03-10	09:50	314162	446332
f20	2016-03-10	10:50	314162	446332
f20	2016-03-10	11:50	314162	446332
f20	2016-03-10	12:50	314162	446330
f20	2016-03-10	13:50	314162	446332
f20	2016-03-10	14:50	314162	446332
f20	2016-03-10	15:50	314162	446331
f20	2016-03-10	16:50	314163	446327
f20	2016-03-10	17:50	314166	446328
f20	2016-03-11	07:50	314165	446328
f20	2016-03-11	08:50	314165	446328
f20	2016-03-11	09:20	314165	446328
f20	2016-03-11	10:50	314165	446328
f20	2016-03-11	11:50	314143	446337
f20	2016-03-11	12:50	314143	446337
f20	2016-03-11	13:50	314143	446337
f20	2016-03-11	14:50	314143	446337
f20	2016-03-11	15:50	314143	446337
f20	2016-03-11	16:50	314141	446337
f20	2016-03-11	17:50	314142	446337
f20	2016-03-12	08:50	314140	446338
f20	2016-03-12	09:50	314139	446338
f20	2016-03-12	10:50	314140	446338
f20	2016-03-12	11:50	314140	446338
f20	2016-03-12	12:50	314139	446339
f20	2016-03-12	13:50	314139	446339
f20	2016-03-12	14:50	314139	446338
f20	2016-03-12	15:50	314138	446338
f20	2016-03-12	16:50	314138	446338
f20	2016-03-12	17:50	314139	446338
f20	2016-03-13	08:50	314138	446338
f20	2016-03-13	09:50	314139	446338
f20	2016-03-13	10:50	314139	446338
f20	2016-03-13	11:50	314139	446339
f20	2016-03-13	12:50	314139	446338
f20	2016-03-13	13:50	314139	446339
f20	2016-03-13	14:50	314139	446339
f20	2016-03-13	15:50	314138	446338
f20	2016-03-13	16:50	314139	446337
f20	2016-03-13	17:50	314139	446337
f20	2016-03-14	08:50	314139	446337
f20	2016-03-14	09:50	314142	446338
f20	2016-03-14	10:50	314142	446338
f20	2016-03-14	11:50	314142	446338
f20	2016-03-14	12:50	314142	446337
f20	2016-03-14	13:50	314142	446338
f20	2016-03-14	14:50	314142	446338
f20	2016-03-14	15:50	314142	446337
f20	2016-03-14	16:50	314142	446337
f20	2016-03-14	17:50	314141	446337
f20	2016-03-15	08:50	314141	446337
f20	2016-03-15	09:50	314141	446337
f20	2016-03-15	10:50	314142	446337
f20	2016-03-15	11:50	314141	446337
f20	2016-03-15	12:50	314142	446337
f20	2016-03-15	13:50	314142	446337
f20	2016-03-15	14:50	314142	446337
f20	2016-03-15	15:50	314142	446337
f20	2016-03-15	16:50	314142	446337
f20	2016-03-15	17:50	314142	446337
f20	2016-03-16	08:50	314141	446338
f20	2016-03-16	09:50	314142	446337
f20	2016-03-16	10:50	314142	446337
f20	2016-03-16	11:50	314142	446337
f20	2016-03-16	12:50	314142	446337
f20	2016-03-16	13:50	314142	446337
f20	2016-03-16	14:50	314142	446337
f20	2016-03-16	15:50	314142	446337
f20	2016-03-16	16:40	314142	446337
f20	2016-03-16	17:49	314142	446337
f20	2016-03-17	08:50	314141	446337
f20	2016-03-17	09:50	314141	446337
f20	2016-03-17	10:50	314141	446337
f20	2016-03-17	11:50	314142	446337
f20	2016-03-17	12:50	314141	446337
f20	2016-03-17	13:50	314142	446338
f20	2016-03-17	14:50	314142	446338
f20	2016-03-17	15:50	314153	446333
f20	2016-03-17	16:50	314160	446333
f20	2016-03-17	17:50	314157	446330
f20	2016-03-18	07:35	314157	446330
f20	2016-03-18	08:45	314158	446330
f20	2016-03-18	09:50	314157	446330
f20	2016-03-18	10:45	314158	446330
f20	2016-03-18	11:45	314158	446330
f20	2016-03-18	12:45	314155	446333
f20	2016-03-18	13:45	314155	446333
f20	2016-03-18	14:45	314155	446333
f20	2016-03-18	15:45	314155	446333
f20	2016-03-18	16:45	314153	446333
f20	2016-03-18	17:45	314154	446334
f20	2016-03-18	18:45	314155	446333
f20	2016-03-19	07:45	314144	446337
f20	2016-03-19	08:45	314140	446336
f20	2016-03-19	09:45	314139	446339
f20	2016-03-19	10:45	314139	446339
f20	2016-03-19	11:45	314139	446338
f20	2016-03-19	12:45	314141	446338
f20	2016-03-19	13:45	314142	446338
f20	2016-03-19	14:45	314142	446338
f20	2016-03-19	15:45	314142	446338
f20	2016-03-19	16:45	314142	446337
f20	2016-03-19	17:45	314142	446338
f20	2016-03-20	07:45	314143	446335
f20	2016-03-20	08:45	314143	446334
f20	2016-03-20	09:45	314143	446334
f20	2016-03-20	10:45	314143	446335
f20	2016-03-20	11:45	314143	446335
f20	2016-03-20	12:45	314143	446335
f20	2016-03-20	13:45	314143	446335
f20	2016-03-20	14:45	314143	446335
f20	2016-03-20	15:45	314143	446335
f20	2016-03-20	16:45	314143	446334
f20	2016-03-20	17:45	314143	446335
f21	2016-03-05	09:50	314164	446324
f21	2016-03-05	10:50	314164	446324
f21	2016-03-05	11:50	314164	446324
f21	2016-03-05	12:50	314164	446324
f21	2016-03-05	13:50	314164	446324
f21	2016-03-05	14:50	314164	446322
f21	2016-03-05	15:50	314164	446322
f21	2016-03-05	16:50	314164	446322
f21	2016-03-05	17:50	314164	446322
f21	2016-03-05	18:20	314164	446322
f21	2016-03-06	08:40	314164	446322
f21	2016-03-06	09:40	314163	446322
f21	2016-03-06	10:40	314163	446322
f21	2016-03-06	11:40	314163	446322
f21	2016-03-06	12:40	314163	446322
f21	2016-03-06	13:40	314163	446322
f21	2016-03-06	14:40	314163	446322
f21	2016-03-06	15:40	314163	446322
f21	2016-03-06	16:40	314163	446322
f21	2016-03-06	17:40	314163	446322
f21	2016-03-07	08:40	314163	446322
f21	2016-03-07	09:40	314163	446322
f21	2016-03-07	10:40	314163	446322
f21	2016-03-07	11:40	314163	446322
f21	2016-03-07	12:40	314163	446322
f21	2016-03-07	13:40	314163	446322
f21	2016-03-07	14:40	314163	446322
f21	2016-03-07	15:40	314163	446322
f21	2016-03-07	16:40	314163	446322
f21	2016-03-07	17:40	314163	446322
f21	2016-03-08	08:40	314163	446322
f21	2016-03-08	09:40	314163	446322
f21	2016-03-08	10:40	314163	446322
f21	2016-03-08	11:40	314163	446322
f21	2016-03-08	12:40	314163	446322
f21	2016-03-08	13:40	314163	446322
f21	2016-03-08	14:40	314163	446322
f21	2016-03-08	15:40	314163	446322
f21	2016-03-08	16:40	314163	446322
f21	2016-03-08	17:40	314166	446328
f21	2016-03-09	08:40	314166	446328
f21	2016-03-09	09:40	314163	446326
f21	2016-03-09	10:40	314163	446326
f21	2016-03-09	11:40	314162	446327
f21	2016-03-09	12:40	314164	446328
f21	2016-03-09	13:40	314164	446328
f21	2016-03-09	14:40	314163	446326
f21	2016-03-09	15:40	314163	446327
f21	2016-03-09	16:40	314161	446322
f21	2016-03-09	17:40	314163	446322
f21	2016-03-10	08:40	314162	446320
f21	2016-03-10	09:40	314162	446320
f21	2016-03-10	10:40	314162	446320
f21	2016-03-10	11:40	314162	446320
f21	2016-03-10	12:40	314162	446321
f21	2016-03-10	13:40	314163	446320
f21	2016-03-10	14:40	314163	446321
f21	2016-03-10	15:40	314162	446320
f21	2016-03-10	16:40	314162	446322
f21	2016-03-10	17:40	314163	446322
f21	2016-03-10	18:10	314163	446321
f21	2016-03-11	08:40	314162	446319
f21	2016-03-11	09:40	314162	446319
f21	2016-03-11	10:40	314162	446320
f21	2016-03-11	12:40	314162	446320
f21	2016-03-11	13:40	314163	446322
f21	2016-03-11	14:40	314163	446322
f21	2016-03-11	15:40	314163	446322
f21	2016-03-11	16:40	314162	446324
f21	2016-03-11	17:40	314162	446321
f21	2016-03-12	08:40	314162	446323
f21	2016-03-12	09:40	314162	446323
f21	2016-03-12	10:40	314163	446322
f21	2016-03-12	11:40	314163	446321
f21	2016-03-12	12:40	314163	446322
f21	2016-03-12	13:40	314163	446322
f21	2016-03-12	14:40	314163	446321
f21	2016-03-12	15:40	314162	446320
f21	2016-03-12	16:40	314163	446322
f21	2016-03-12	17:40	314163	446322
f21	2016-03-13	08:40	314163	446320
f21	2016-03-13	15:20	314163	446327
f21	2016-03-13	16:20	314162	446328
f21	2016-03-13	17:20	314162	446328
f21	2016-03-14	08:40	314163	446326
f21	2016-03-14	09:40	314162	446326
f21	2016-03-14	10:40	314162	446326
f21	2016-03-14	11:40	314163	446327
f21	2016-03-14	12:40	314166	446328
f21	2016-03-14	13:40	314166	446328
f21	2016-03-14	14:40	314166	446328
f21	2016-03-14	15:40	314166	446328
f21	2016-03-14	16:40	314165	446328
f21	2016-03-14	17:40	314166	446328
f21	2016-03-15	08:40	314165	446328
f21	2016-03-15	09:40	314166	446328
f21	2016-03-15	10:40	314165	446328
f21	2016-03-15	11:40	314166	446328
f21	2016-03-15	12:40	314166	446328
f21	2016-03-15	13:40	314166	446328
f21	2016-03-15	14:40	314166	446328
f21	2016-03-15	15:40	314166	446328
f21	2016-03-15	16:40	314165	446328
f21	2016-03-15	17:40	314166	446328
f21	2016-03-16	08:40	314166	446328
f21	2016-03-16	09:40	314166	446328
f21	2016-03-16	10:40	314165	446329
f21	2016-03-16	11:40	314165	446329
f21	2016-03-16	12:40	314165	446329
f21	2016-03-16	13:40	314165	446329
f21	2016-03-16	14:40	314165	446328
f21	2016-03-16	15:40	314165	446329
f21	2016-03-16	16:33	314165	446329
f21	2016-03-16	17:42	314165	446327
f21	2016-03-17	07:20	314164	446324
f21	2016-03-17	08:40	314164	446322
f21	2016-03-17	09:40	314164	446322
f21	2016-03-17	10:40	314164	446322
f21	2016-03-17	11:40	314164	446322
f21	2016-03-17	12:40	314164	446322
f21	2016-03-17	13:40	314164	446322
f21	2016-03-17	14:40	314164	446322
f21	2016-03-17	15:40	314164	446321
f21	2016-03-17	16:40	314164	446321
f21	2016-03-17	17:40	314164	446321
f21	2016-03-18	07:40	314164	446320
f22	2016-03-11	12:55	314144	446337
f22	2016-03-11	13:55	314146	446338
f22	2016-03-11	14:55	314146	446338
f22	2016-03-11	15:55	314146	446338
f22	2016-03-11	16:55	314147	446338
f22	2016-03-11	17:55	314146	446337
f22	2016-03-12	08:55	314147	446338
f22	2016-03-12	09:55	314150	446335
f22	2016-03-12	10:55	314150	446334
f22	2016-03-12	11:55	314150	446335
f22	2016-03-12	12:55	314150	446335
f22	2016-03-12	13:55	314150	446335
f22	2016-03-12	14:55	314149	446335
f22	2016-03-12	15:55	314148	446336
f22	2016-03-12	16:55	314148	446335
f22	2016-03-12	17:55	314148	446336
f22	2016-03-13	08:55	314148	446336
f22	2016-03-13	09:55	314148	446336
f22	2016-03-13	10:55	314148	446336
f22	2016-03-13	11:55	314150	446335
f22	2016-03-13	12:55	314150	446335
f22	2016-03-13	13:55	314150	446335
f22	2016-03-13	14:55	314150	446335
f22	2016-03-13	15:55	314150	446335
f22	2016-03-13	16:55	314151	446335
f22	2016-03-13	17:55	314151	446336
f22	2016-03-14	08:55	314151	446336
f22	2016-03-14	09:55	314151	446336
f22	2016-03-14	10:55	314151	446336
f22	2016-03-14	11:55	314151	446336
f22	2016-03-14	12:55	314151	446336
f22	2016-03-14	13:55	314155	446330
f22	2016-03-14	14:55	314157	446329
f22	2016-03-14	15:55	314157	446329
f22	2016-03-14	16:55	314157	446329
f22	2016-03-14	17:55	314157	446330
f22	2016-03-15	07:55	314157	446329
f22	2016-03-15	08:55	314157	446329
f22	2016-03-15	09:55	314152	446336
f22	2016-03-15	10:55	314152	446336
f22	2016-03-15	11:55	314152	446336
f22	2016-03-15	12:55	314151	446336
f22	2016-03-15	13:55	314151	446336
f22	2016-03-15	14:55	314151	446336
f22	2016-03-15	15:55	314152	446336
f22	2016-03-15	16:55	314152	446336
f22	2016-03-16	08:55	314150	446335
f22	2016-03-16	09:55	314150	446335
f22	2016-03-16	10:55	314150	446335
f22	2016-03-16	11:55	314150	446335
f22	2016-03-16	12:55	314150	446335
f22	2016-03-16	13:55	314150	446335
f22	2016-03-16	14:55	314150	446335
f22	2016-03-16	15:55	314150	446335
f22	2016-03-16	16:39	314151	446335
f22	2016-03-16	17:48	314151	446336
f22	2016-03-17	08:55	314152	446336
f22	2016-03-17	09:55	314151	446336
f22	2016-03-17	10:55	314151	446336
f22	2016-03-17	11:55	314151	446336
f22	2016-03-17	12:55	314152	446340
f22	2016-03-17	13:55	314152	446340
f22	2016-03-17	14:55	314154	446346
f22	2016-03-17	15:55	314153	446344
f22	2016-03-17	16:55	314154	446343
f22	2016-03-17	17:55	314152	446343
f22	2016-03-17	18:25	314152	446342
f22	2016-03-18	07:40	314151	446342
f22	2016-03-18	08:55	314152	446342
f22	2016-03-18	09:55	314152	446342
f22	2016-03-18	10:55	314152	446342
f22	2016-03-18	11:55	314151	446342
f22	2016-03-18	12:55	314151	446341
f22	2016-03-18	13:55	314150	446342
f22	2016-03-18	14:55	314149	446341
f22	2016-03-18	15:55	314150	446335
f22	2016-03-18	16:55	314148	446336
f22	2016-03-18	17:55	314148	446336
f22	2016-03-18	18:55	314149	446336
f22	2016-03-19	07:55	314151	446335
f22	2016-03-19	08:55	314148	446335
f22	2016-03-19	09:55	314148	446336
f22	2016-03-19	10:55	314148	446335
f22	2016-03-19	11:55	314148	446336
f22	2016-03-19	12:55	314148	446335
f22	2016-03-19	13:55	314148	446336
f22	2016-03-19	14:55	314157	446330
f22	2016-03-19	15:55	314158	446330
f22	2016-03-19	16:55	314158	446330
f22	2016-03-19	17:55	314158	446330
f22	2016-03-20	07:55	314158	446329
f22	2016-03-20	08:55	314158	446330
f22	2016-03-20	09:55	314157	446330
f22	2016-03-20	10:55	314155	446330
f22	2016-03-20	11:55	314155	446330
f22	2016-03-20	12:55	314152	446333
f22	2016-03-20	13:55	314152	446333
f22	2016-03-20	14:55	314152	446332
f22	2016-03-20	15:55	314152	446332
f22	2016-03-20	16:55	314152	446333
f22	2016-03-20	17:55	314152	446336
f3	2016-02-08	15:15	314192	446494
f3	2016-02-08	16:15	314194	446496
f3	2016-02-08	17:15	314194	446497
f3	2016-02-08	18:15	314195	446497
f3	2016-02-09	08:45	314195	446497
f3	2016-02-09	09:45	314195	446496
f3	2016-02-09	10:40	314195	446496
f3	2016-02-09	11:45	314195	446497
f3	2016-02-09	12:45	314195	446496
f3	2016-02-09	13:45	314195	446496
f3	2016-02-09	14:15	314195	446496
f3	2016-02-09	15:45	314198	446500
f3	2016-02-09	16:45	314199	446499
f3	2016-02-09	17:45	314200	446496
f3	2016-02-10	08:30	314198	446497
f3	2016-02-10	09:30	314198	446497
f3	2016-02-10	10:30	314197	446496
f3	2016-02-10	11:30	314193	446491
f3	2016-02-10	12:30	314193	446491
f3	2016-02-10	13:30	314191	446487
f3	2016-02-10	14:30	314189	446483
f3	2016-02-10	15:30	314189	446483
f3	2016-02-10	16:00	314189	446483
f3	2016-02-10	17:30	314187	446478
f3	2016-02-10	18:30	314187	446478
f3	2016-02-11	08:45	314187	446478
f3	2016-02-11	09:45	314187	446478
f3	2016-02-11	10:45	314187	446479
f3	2016-02-11	11:50	314185	446480
f3	2016-02-11	12:50	314185	446480
f3	2016-02-11	13:50	314186	446480
f3	2016-02-11	14:50	314185	446480
f3	2016-02-11	15:50	314186	446480
f3	2016-02-11	16:50	314186	446479
f3	2016-02-11	17:50	314186	446479
f3	2016-02-12	08:40	314186	446480
f3	2016-02-12	09:40	314186	446479
f3	2016-02-12	10:40	314187	446479
f3	2016-02-12	11:40	314187	446479
f3	2016-02-12	12:40	314187	446479
f3	2016-02-12	13:40	314187	446478
f3	2016-02-12	14:40	314187	446478
f3	2016-02-12	15:40	314187	446478
f3	2016-02-12	16:40	314187	446478
f3	2016-02-12	17:40	314187	446479
f3	2016-02-13	08:40	314187	446478
f3	2016-02-13	09:40	314187	446479
f3	2016-02-13	10:40	314187	446478
f3	2016-02-13	11:40	314187	446479
f3	2016-02-13	12:40	314188	446477
f3	2016-02-13	13:40	314192	446478
f3	2016-02-13	14:40	314191	446478
f3	2016-02-13	15:40	314191	446478
f3	2016-02-13	16:40	314191	446478
f3	2016-02-13	17:40	314189	446482
f3	2016-02-14	08:40	314188	446486
f3	2016-02-14	09:40	314188	446486
f3	2016-02-14	10:40	314188	446486
f3	2016-02-14	11:40	314188	446487
f3	2016-02-14	12:40	314188	446487
f3	2016-02-14	13:40	314188	446487
f3	2016-02-14	14:40	314189	446486
f3	2016-02-14	15:40	314188	446487
f3	2016-02-14	16:40	314188	446487
f3	2016-02-14	17:40	314188	446487
f3	2016-02-14	18:10	314188	446487
f3	2016-02-15	08:40	314188	446486
f3	2016-02-15	09:40	314188	446486
f3	2016-02-15	10:40	314188	446486
f3	2016-02-15	11:40	314187	446486
f3	2016-02-15	12:40	314187	446486
f3	2016-02-15	13:40	314187	446486
f3	2016-02-15	14:40	314187	446487
f3	2016-02-15	15:40	314188	446487
f3	2016-02-15	16:40	314187	446487
f3	2016-02-15	17:40	314188	446490
f3	2016-02-15	18:10	314188	446490
f3	2016-02-16	08:40	314188	446491
f3	2016-02-16	09:40	314189	446491
f3	2016-02-16	10:40	314188	446493
f3	2016-02-16	11:40	314188	446493
f3	2016-02-16	12:40	314188	446493
f3	2016-02-16	13:40	314188	446493
f3	2016-02-16	14:40	314188	446493
f3	2016-02-16	15:40	314187	446495
f3	2016-02-16	16:40	314187	446495
f3	2016-02-16	17:40	314187	446495
f3	2016-02-17	08:40	314189	446496
f3	2016-02-17	09:40	314189	446496
f3	2016-02-17	10:40	314189	446496
f3	2016-02-17	11:40	314189	446494
f3	2016-02-17	12:40	314189	446494
f3	2016-02-17	13:40	314189	446494
f3	2016-02-17	14:40	314189	446494
f3	2016-02-17	15:40	314189	446494
f3	2016-02-17	16:40	314189	446494
f3	2016-02-17	17:40	314189	446494
f3	2016-02-18	08:40	314189	446493
f3	2016-02-18	09:40	314187	446491
f3	2016-02-18	10:40	314187	446491
f3	2016-02-18	11:40	314183	446488
f3	2016-02-18	12:40	314182	446488
f3	2016-02-18	13:40	314183	446488
f3	2016-02-18	14:40	314183	446488
f3	2016-02-18	15:40	314182	446488
f3	2016-02-18	16:40	314182	446488
f3	2016-02-18	17:40	314182	446489
f3	2016-02-18	18:10	314183	446489
f3	2016-02-19	08:40	314186	446493
f3	2016-02-19	09:40	314189	446496
f3	2016-02-19	10:40	314189	446496
f3	2016-02-19	11:40	314189	446496
f3	2016-02-19	12:40	314189	446496
f3	2016-02-19	13:40	314189	446496
f3	2016-02-19	14:40	314189	446496
f3	2016-02-19	15:40	314189	446494
f3	2016-02-19	16:40	314191	446495
f3	2016-02-19	17:40	314189	446494
f3	2016-02-20	08:40	314190	446495
f3	2016-02-20	09:40	314190	446490
f3	2016-02-20	10:40	314193	446491
f3	2016-02-20	11:40	314196	446497
f3	2016-02-20	13:40	314187	446478
f3	2016-02-20	14:40	314187	446478
f3	2016-02-20	15:40	314185	446477
f3	2016-02-20	16:40	314184	446476
f3	2016-02-20	17:40	314185	446476
f3	2016-02-20	18:10	314185	446478
f3	2016-02-21	08:40	314184	446477
f3	2016-02-21	09:40	314184	446477
f3	2016-02-21	10:40	314184	446477
f3	2016-02-21	11:40	314184	446477
f3	2016-02-21	12:40	314184	446476
f3	2016-02-21	13:40	314185	446476
f3	2016-02-21	14:40	314185	446476
f3	2016-02-21	15:40	314185	446476
f3	2016-02-21	16:40	314185	446476
f3	2016-02-21	17:40	314185	446479
f3	2016-02-22	08:40	314183	446475
f3	2016-02-22	09:40	314183	446475
f3	2016-02-22	10:40	314183	446475
f3	2016-02-22	11:40	314184	446477
f3	2016-02-22	12:40	314184	446476
f3	2016-02-22	13:40	314185	446476
f3	2016-02-22	14:40	314184	446477
f3	2016-02-22	15:40	314185	446478
f3	2016-02-22	16:40	314181	446482
f3	2016-02-22	17:40	314182	446483
f3	2016-02-22	18:10	314182	446483
f5	2016-02-10	14:30	314187	446429
f5	2016-02-10	15:30	314189	446429
f5	2016-02-10	16:30	314189	446429
f5	2016-02-10	17:30	314189	446429
f5	2016-02-10	18:30	314189	446429
f5	2016-02-11	08:30	314189	446432
f5	2016-02-11	09:30	314189	446432
f5	2016-02-11	10:30	314189	446432
f5	2016-02-11	11:40	314190	446432
f5	2016-02-11	12:40	314190	446432
f5	2016-02-11	13:40	314190	446432
f5	2016-02-11	14:40	314189	446433
f5	2016-02-11	15:40	314189	446433
f5	2016-02-11	16:40	314189	446433
f5	2016-02-11	17:40	314189	446433
f5	2016-02-12	08:35	314188	446436
f5	2016-02-12	09:35	314186	446431
f5	2016-02-12	10:35	314184	446431
f5	2016-02-12	11:35	314184	446431
f5	2016-02-12	12:35	314184	446431
f5	2016-02-12	13:35	314184	446431
f5	2016-02-12	14:35	314184	446431
f5	2016-02-12	15:35	314184	446431
f5	2016-02-12	16:35	314184	446431
f5	2016-02-12	17:35	314182	446429
f5	2016-02-13	08:35	314185	446426
f5	2016-02-13	09:35	314185	446426
f5	2016-02-13	10:35	314185	446426
f5	2016-02-13	11:35	314185	446425
f5	2016-02-13	12:35	314186	446423
f5	2016-02-13	13:35	314186	446423
f5	2016-02-13	14:35	314186	446423
f5	2016-02-13	15:35	314185	446422
f5	2016-02-13	16:35	314186	446422
f5	2016-02-13	17:35	314184	446422
f5	2016-02-14	08:35	314186	446422
f5	2016-02-14	09:35	314186	446422
f5	2016-02-14	10:35	314185	446425
f5	2016-02-14	11:35	314185	446426
f5	2016-02-14	12:35	314185	446426
f5	2016-02-14	13:35	314185	446426
f5	2016-02-14	14:35	314187	446428
f5	2016-02-14	15:35	314188	446428
f5	2016-02-14	16:35	314188	446428
f5	2016-02-14	17:35	314188	446428
f5	2016-02-15	08:35	314188	446428
f5	2016-02-15	09:35	314188	446428
f5	2016-02-15	10:35	314188	446428
f5	2016-02-15	11:35	314188	446429
f5	2016-02-15	12:35	314187	446429
f5	2016-02-15	13:35	314187	446429
f5	2016-02-15	14:35	314187	446429
f5	2016-02-15	15:35	314187	446429
f5	2016-02-15	16:35	314188	446431
f5	2016-02-15	17:35	314188	446433
f5	2016-02-15	18:05	314188	446432
f5	2016-02-16	08:35	314189	446433
f5	2016-02-16	09:35	314189	446433
f5	2016-02-16	10:35	314189	446432
f5	2016-02-16	11:35	314189	446432
f5	2016-02-16	13:35	314186	446432
f5	2016-02-16	14:35	314183	446431
f5	2016-02-16	15:35	314183	446431
f5	2016-02-16	16:35	314184	446431
f5	2016-02-16	17:35	314183	446431
f5	2016-02-17	08:35	314184	446431
f5	2016-02-17	09:35	314184	446431
f5	2016-02-17	10:35	314182	446431
f5	2016-02-17	11:35	314184	446431
f5	2016-02-17	12:35	314182	446430
f5	2016-02-17	13:35	314183	446430
f5	2016-02-17	14:35	314183	446430
f5	2016-02-17	15:35	314183	446430
f5	2016-02-17	16:35	314183	446430
f5	2016-02-17	17:35	314183	446430
f5	2016-02-18	08:35	314184	446431
f5	2016-02-18	09:35	314184	446431
f5	2016-02-18	10:35	314182	446432
f5	2016-02-18	11:35	314183	446431
f5	2016-02-18	12:05	314184	446431
f5	2016-02-18	13:35	314185	446432
f5	2016-02-18	14:35	314186	446431
f5	2016-02-18	15:35	314187	446432
f5	2016-02-18	16:35	314187	446432
f5	2016-02-18	17:35	314187	446432
f5	2016-02-19	08:35	314185	446424
f5	2016-02-19	09:35	314187	446430
f5	2016-02-19	10:35	314187	446431
f5	2016-02-19	11:35	314187	446431
f5	2016-02-19	12:35	314184	446431
f5	2016-02-19	13:35	314184	446428
f5	2016-02-19	14:35	314184	446428
f5	2016-02-19	15:35	314184	446428
f5	2016-02-19	16:35	314184	446428
f5	2016-02-19	17:35	314184	446428
f5	2016-02-20	08:35	314184	446428
f5	2016-02-20	09:35	314184	446429
f5	2016-02-20	10:35	314184	446430
f5	2016-02-20	11:35	314188	446434
f5	2016-02-20	12:35	314188	446436
f5	2016-02-20	13:35	314188	446436
f5	2016-02-20	14:35	314188	446436
f5	2016-02-20	15:35	314188	446436
f5	2016-02-20	16:35	314188	446436
f5	2016-02-20	17:35	314188	446436
f5	2016-02-20	18:05	314187	446436
f5	2016-02-21	08:35	314182	446436
f5	2016-02-21	09:35	314184	446436
f5	2016-02-21	10:35	314188	446435
f5	2016-02-21	11:35	314188	446435
f5	2016-02-21	12:35	314188	446435
f5	2016-02-21	13:35	314191	446435
f5	2016-02-21	14:35	314189	446436
f5	2016-02-21	15:35	314188	446436
f5	2016-02-21	16:35	314188	446436
f5	2016-02-21	17:35	314188	446436
f5	2016-02-22	08:35	314188	446426
f5	2016-02-22	09:35	314190	446426
f5	2016-02-22	10:35	314190	446426
f5	2016-02-22	11:35	314190	446426
f5	2016-02-22	12:35	314190	446426
f5	2016-02-22	13:35	314190	446426
f5	2016-02-22	14:35	314190	446426
f5	2016-02-22	15:35	314190	446426
f5	2016-02-22	16:35	314190	446426
f5	2016-02-22	17:35	314183	446420
f5	2016-02-23	07:35	314183	446421
f5	2016-02-23	08:35	314184	446422
f5	2016-02-23	09:35	314186	446423
f5	2016-02-23	10:35	314188	446424
f5	2016-02-23	11:35	314188	446423
f5	2016-02-23	12:35	314190	446426
f5	2016-02-23	13:35	314190	446426
f5	2016-02-23	14:35	314191	446427
f5	2016-02-23	15:35	314191	446429
f5	2016-02-23	16:35	314189	446429
f5	2016-02-23	17:35	314189	446429
f5	2016-02-24	08:35	314188	446430
f5	2016-02-24	09:35	314188	446430
f5	2016-02-24	10:35	314188	446430
f5	2016-02-24	11:35	314187	446431
f5	2016-02-24	12:35	314188	446430
f5	2016-02-24	13:35	314188	446430
f5	2016-02-24	14:35	314188	446430
f5	2016-02-24	15:35	314187	446432
f5	2016-02-24	16:35	314187	446432
f5	2016-02-24	17:35	314187	446432
f5	2016-02-25	08:35	314187	446432
f5	2016-02-25	09:35	314186	446432
f5	2016-02-25	11:35	314187	446432
f5	2016-02-25	12:35	314187	446432
f5	2016-02-25	13:35	314188	446435
f5	2016-02-25	14:35	314188	446435
f5	2016-02-25	16:35	314188	446436
f5	2016-02-25	17:35	314181	446436
f6	2016-02-11	10:00	314214	446373
f6	2016-02-11	11:30	314214	446373
f6	2016-02-11	12:30	314214	446373
f6	2016-02-11	13:30	314215	446373
f6	2016-02-11	14:30	314213	446372
f6	2016-02-11	15:30	314213	446372
f6	2016-02-11	16:30	314213	446372
f6	2016-02-11	17:30	314213	446372
f6	2016-02-12	08:30	314203	446374
f6	2016-02-12	09:30	314204	446374
f6	2016-02-12	10:30	314204	446375
f6	2016-02-12	11:30	314203	446374
f6	2016-02-12	12:30	314203	446374
f6	2016-02-12	13:30	314203	446374
f6	2016-02-12	14:30	314203	446374
f6	2016-02-12	15:30	314203	446374
f6	2016-02-12	16:30	314203	446374
f6	2016-02-12	17:30	314200	446372
f6	2016-02-13	08:30	314200	446372
f6	2016-02-13	09:30	314200	446372
f6	2016-02-13	10:30	314199	446372
f6	2016-02-13	11:30	314199	446372
f6	2016-02-13	12:30	314198	446370
f6	2016-02-13	13:30	314198	446370
f6	2016-02-13	14:30	314198	446370
f6	2016-02-13	15:30	314197	446369
f6	2016-02-13	16:30	314197	446369
f6	2016-02-13	17:30	314198	446370
f6	2016-02-14	08:30	314198	446370
f6	2016-02-14	09:30	314199	446370
f6	2016-02-14	10:30	314199	446370
f6	2016-02-14	11:30	314198	446370
f6	2016-02-14	12:30	314199	446370
f6	2016-02-14	13:30	314199	446370
f6	2016-02-14	14:30	314197	446370
f6	2016-02-14	15:30	314197	446369
f6	2016-02-14	16:30	314198	446370
f6	2016-02-14	17:30	314198	446370
f6	2016-02-15	08:30	314198	446370
f6	2016-02-15	09:30	314198	446370
f6	2016-02-15	10:30	314198	446370
f6	2016-02-15	11:30	314198	446370
f6	2016-02-15	12:30	314196	446369
f6	2016-02-15	13:30	314196	446369
f6	2016-02-15	14:30	314196	446369
f6	2016-02-15	15:30	314196	446369
f6	2016-02-15	16:30	314195	446369
f6	2016-02-15	17:30	314196	446372
f6	2016-02-16	08:30	314193	446373
f6	2016-02-16	09:30	314193	446373
f6	2016-02-16	10:30	314193	446372
f6	2016-02-16	11:30	314193	446372
f6	2016-02-16	12:30	314193	446372
f6	2016-02-16	13:30	314193	446372
f6	2016-02-16	14:30	314193	446372
f6	2016-02-16	15:30	314193	446372
f6	2016-02-16	16:30	314193	446372
f6	2016-02-16	17:30	314193	446372
f6	2016-02-17	08:30	314194	446374
f6	2016-02-17	09:30	314194	446374
f6	2016-02-17	10:30	314194	446373
f6	2016-02-17	11:30	314194	446372
f6	2016-02-17	12:30	314193	446375
f6	2016-02-17	13:30	314193	446375
f6	2016-02-17	14:30	314193	446375
f6	2016-02-17	15:30	314193	446375
f6	2016-02-17	16:30	314193	446375
f6	2016-02-17	17:30	314193	446375
f6	2016-02-18	08:30	314194	446374
f6	2016-02-18	09:30	314196	446374
f6	2016-02-18	10:30	314199	446372
f6	2016-02-18	11:30	314199	446372
f6	2016-02-18	12:30	314199	446371
f6	2016-02-18	13:30	314194	446366
f6	2016-02-18	14:30	314196	446366
f6	2016-02-18	15:30	314196	446367
f6	2016-02-18	16:30	314195	446366
f6	2016-02-18	17:30	314195	446366
f6	2016-02-19	08:30	314195	446366
f6	2016-02-19	09:30	314195	446366
f6	2016-02-19	10:30	314193	446374
f6	2016-02-19	11:30	314189	446378
f6	2016-02-19	12:20	314202	446379
f6	2016-02-19	13:30	314202	446379
f6	2016-02-19	14:30	314199	446372
f6	2016-02-19	15:30	314200	446372
f6	2016-02-19	16:30	314200	446372
f6	2016-02-19	17:30	314200	446373
f6	2016-02-20	08:30	314199	446372
f6	2016-02-20	09:30	314199	446372
f6	2016-02-20	10:30	314199	446372
f6	2016-02-20	11:30	314198	446370
f6	2016-02-20	12:30	314198	446370
f6	2016-02-20	13:30	314197	446370
f6	2016-02-20	14:30	314196	446371
f6	2016-02-20	15:30	314193	446372
f6	2016-02-20	16:30	314193	446372
f6	2016-02-20	17:30	314191	446368
f6	2016-02-20	18:30	314191	446368
f6	2016-02-21	07:40	314192	446372
f6	2016-02-21	08:30	314194	446372
f6	2016-02-21	09:30	314194	446372
f6	2016-02-21	10:::	314195	446373
f6	2016-02-21	11:30	314195	446372
f6	2016-02-21	12:30	314197	446369
f6	2016-02-21	13:30	314198	446370
f6	2016-02-21	14:30	314198	446370
f6	2016-02-21	15:30	314198	446370
f6	2016-02-21	16:30	314198	446370
f6	2016-02-21	17:30	314196	446371
f6	2016-02-22	08:30	314197	446367
f6	2016-02-22	09:30	314197	446367
f6	2016-02-22	10:30	314197	446368
f6	2016-02-22	11:30	314198	446369
f6	2016-02-22	12:30	314198	446369
f6	2016-02-22	13:30	314198	446369
f6	2016-02-22	14:30	314196	446367
f6	2016-02-22	15:30	314196	446365
f6	2016-02-22	16:30	314196	446365
f6	2016-02-22	17:30	314200	446372
f6	2016-02-23	08:30	314198	446369
f6	2016-02-23	09:30	314198	446369
f6	2016-02-23	10:30	314198	446369
f6	2016-02-23	11:30	314198	446369
f6	2016-02-23	12:30	314198	446369
f6	2016-02-23	13:30	314198	446369
f6	2016-02-23	14:30	314198	446369
f6	2016-02-23	15:30	314198	446369
f6	2016-02-23	16:30	314198	446369
f6	2016-02-23	17:30	314199	446372
f6	2016-02-24	08:30	314199	446372
f6	2016-02-24	09:30	314199	446372
f6	2016-02-24	10:30	314199	446372
f6	2016-02-24	11:30	314203	446373
f6	2016-02-24	12:30	314203	446373
f6	2016-02-24	13:30	314203	446373
f6	2016-02-24	14:30	314203	446373
f6	2016-02-24	15:30	314203	446373
f6	2016-02-24	16:30	314202	446372
f6	2016-02-24	17:30	314202	446372
f6	2016-02-25	08:30	314201	446365
f6	2016-02-25	09:30	314202	446362
f6	2016-02-25	10:30	314199	446359
f6	2016-02-25	11:30	314200	446359
f6	2016-02-25	12:30	314199	446359
f6	2016-02-25	13:30	314199	446359
f6	2016-02-25	14:30	314200	446358
f6	2016-02-25	16:30	314201	446358
f6	2016-02-25	17:30	314201	446358
f6	2016-02-26	09:00	314199	446359
f8	2016-02-11	12:10	314167	446386
f8	2016-02-11	13:10	314167	446385
f8	2016-02-11	14:10	314167	446383
f8	2016-02-11	15:10	314167	446383
f8	2016-02-11	16:10	314167	446383
f8	2016-02-11	17:10	314167	446383
f8	2016-02-12	08:25	314167	446383
f8	2016-02-12	09:25	314167	446383
f8	2016-02-12	10:25	314167	446383
f8	2016-02-12	11:25	314167	446383
f8	2016-02-12	12:25	314167	446383
f8	2016-02-12	13:25	314167	446383
f8	2016-02-12	14:25	314167	446383
f8	2016-02-12	15:25	314167	446383
f8	2016-02-12	16:25	314167	446383
f8	2016-02-12	17:25	314167	446383
f8	2016-02-13	08:25	314167	446383
f8	2016-02-13	09:25	314167	446383
f8	2016-02-13	10:25	314167	446384
f8	2016-02-13	11:25	314167	446383
f8	2016-02-13	12:25	314168	446384
f8	2016-02-13	13:25	314167	446383
f8	2016-02-13	14:25	314167	446383
f8	2016-02-13	15:25	314167	446383
f8	2016-02-13	16:25	314167	446383
f8	2016-02-13	17:25	314167	446384
f8	2016-02-14	08:25	314167	446383
f8	2016-02-14	09:25	314167	446383
f8	2016-02-14	10:25	314167	446383
f8	2016-02-14	11:25	314167	446383
f8	2016-02-14	12:25	314167	446383
f8	2016-02-14	13:25	314167	446383
f8	2016-02-14	14:25	314167	446383
f8	2016-02-14	15:25	314167	446383
f8	2016-02-14	16:25	314167	446383
f8	2016-02-14	17:25	314167	446383
f8	2016-02-15	07:55	314167	446383
f8	2016-02-15	08:25	314167	446383
f8	2016-02-15	09:25	314167	446383
f8	2016-02-15	10:25	314167	446383
f8	2016-02-15	11:25	314167	446383
f8	2016-02-15	12:25	314167	446383
f8	2016-02-15	13:25	314167	446383
f8	2016-02-15	14:25	314167	446383
f8	2016-02-15	15:25	314167	446383
f8	2016-02-15	16:25	314167	446383
f8	2016-02-15	17:25	314167	446383
f8	2016-02-16	07:55	314167	446383
f8	2016-02-16	08:25	314167	446383
f8	2016-02-16	09:25	314167	446383
f8	2016-02-16	10:25	314164	446385
f8	2016-02-16	11:25	314164	446385
f8	2016-02-16	12:25	314164	446385
f8	2016-02-16	13:25	314163	446386
f8	2016-02-16	14:25	314163	446387
f8	2016-02-16	15:25	314163	446387
f8	2016-02-16	16:25	314163	446387
f8	2016-02-16	17:25	314163	446387
f8	2016-02-17	08:25	314163	446387
f8	2016-02-17	09:25	314162	446387
f8	2016-02-17	10:25	314163	446387
f8	2016-02-17	11:25	314163	446387
f8	2016-02-17	12:25	314163	446387
f8	2016-02-17	13:25	314163	446387
f8	2016-02-17	14:25	314163	446387
f8	2016-02-17	15:25	314162	446387
f8	2016-02-17	16:25	314163	446387
f8	2016-02-17	17:25	314163	446387
f9	2016-02-11	16:05	314196	446496
f9	2016-02-11	17:05	314197	446496
f9	2016-02-11	18:05	314196	446496
f9	2016-02-12	08:50	314194	446502
[truncated: 40 more rows]
