# Supplementary material for: Reproductive behavior drives female space use in a sedentary Neotropical frog
Source: PeerJ journal article supplement (doi:10.7717/peerj.8920), 2020-04-17
Supplement: SupplementaryFigureS4.pdf [file SupplementaryFigureS4.pdf]

f05

- Home range (KUD95%)
- ◌ Center of use (KUD30%)

- Movement before reaching center
- Relocations in center of use
- Sallies
- Pre-mating movement
- ★ Clutch deposition site
- Post-mating movement

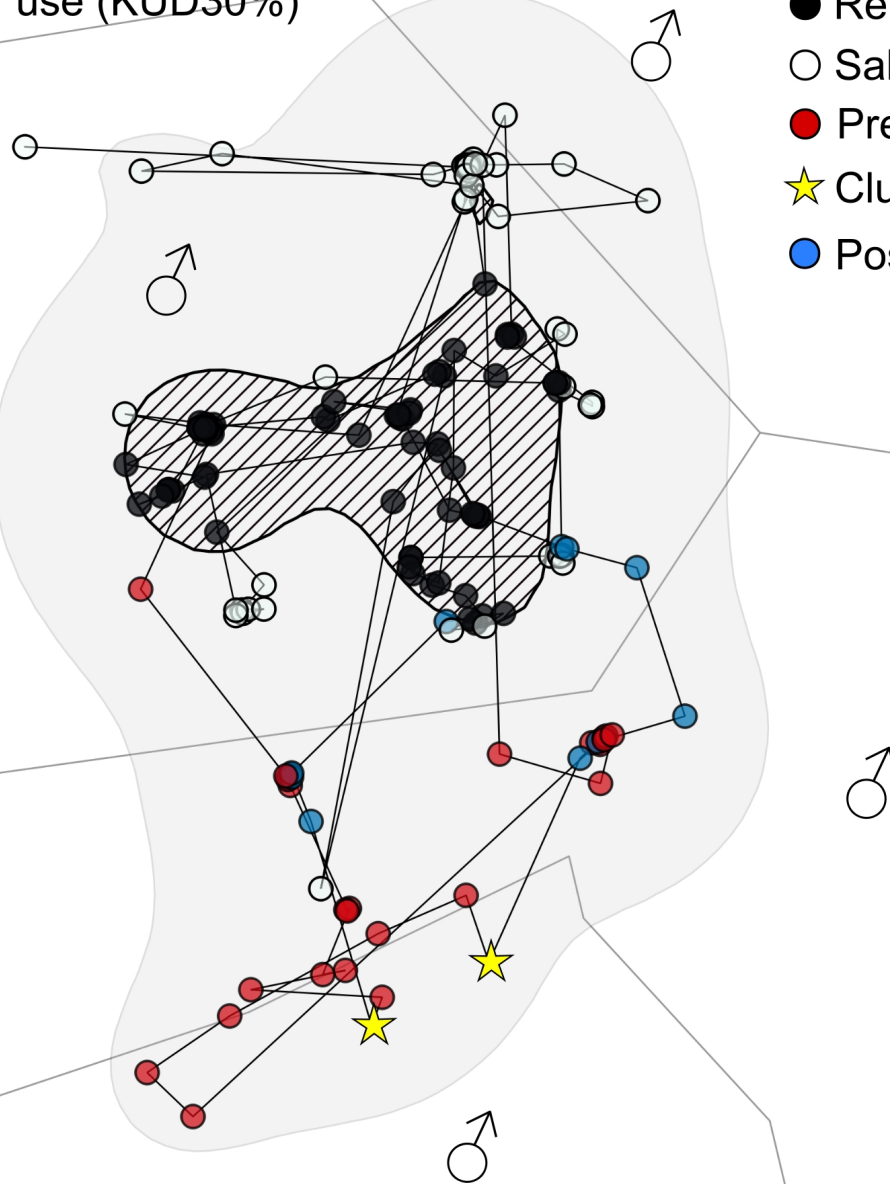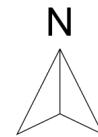

5 m
